# Supplementary material
Source: publisher site journal article supplement (https://www.dovepress.com/get_supplementary_file.php?f=302800.docx)
Supplement: Supplementary file 1 [file get_supplementary_file.php]

**Supplementary Table 1.** Clinical pathology of retinoblastoma patients.

| NO | Age at initial diagnosis | Gender | Tumor size (mm) | ICRB | Tumor laterality | Optic nerve invasion | Differentiation grade |
| --- | --- | --- | --- | --- | --- | --- | --- |
| 20120004 | 11 | female | 12.4 | Ⅱ | Unilateral | Positive | Poorly |
| 20120007 | 43 | male | 5 | Ⅲ | Bilateral | Positive | Well |
| 20120012 | 26 | male | 11.3 | Ⅰ | Bilateral | Positive | Moderately |
| 20120016 | 51 | male | 6.2 | IV | Unilateral | Negative | Poorly |
| 20120023 | 67 | male | 13.5 | Ⅱ | Unilateral | Positive | Poorly |
| 20120033 | 43 | female | 2.6 | Ⅰ | Bilateral | Negative | Poorly |
| 20120036 | 39 | female | 4.7 | Ⅲ | Bilateral | Negative | Well |
| 20120043 | 67 | female | 5.8 | Ⅰ | Unilateral | Positive | Poorly |
| 20130017 | 16 | female | 12.1 | Ⅰ | Bilateral | Positive | Moderately |
| 20130052 | 84 | male | 3.5 | Ⅲ | Bilateral | Negative | Moderately |
| 20130076 | 10 | male | 7.5 | Ⅳ | Bilateral | Negative | Moderately |
| 20130089 | 82 | male | 13.4 | Ⅱ | Unilateral | Positive | Well |
| 20130134 | 67 | female | 10.7 | Ⅲ | Unilateral | Positive | Moderately |
| 20130146 | 34 | male | 8.3 | Ⅲ | Unilateral | Positive | Poorly |
| 20130167 | 14 | female | 14.6 | Ⅱ | Unilateral | Negative | Moderately |
| 20130184 | 45 | female | 5.9 | Ⅲ | Bilateral | Positive | Well |
| 20140002 | 91 | female | 16.2 | IV | Unilateral | Negative | Moderately |
| 20140011 | 27 | male | 7.2 | Ⅰ | Bilateral | Negative | Moderately |
| 20140037 | 105 | male | 11.8 | Ⅲ | Bilateral | Positive | Poorly |
| 20140042 | 22 | male | 13.5 | Ⅰ | Unilateral | Negative | Moderately |
| 20140046 | 37 | female | 8.1 | Ⅱ | Unilateral | Negative | Well |
| 20140051 | 42 | male | 11.5 | Ⅲ | Bilateral | Positive | Moderately |
| 20140059 | 18 | female | 6.5 | Ⅱ | Bilateral | Positive | Moderately |
| 20140063 | 26 | female | 12.6 | Ⅲ | Unilateral | Negative | Poorly |
| 20140098 | 59 | female | 14.7 | IV | Unilateral | Positive | Poorly |
| 20140136 | 78 | female | 13.8 | Ⅲ | Bilateral | Negative | Moderately |
| 20140163 | 13 | male | 12.1 | Ⅱ | Bilateral | Negative | Well |
| 20150023 | 22 | male | 6.5 | Ⅲ | Bilateral | Positive | Poorly |
| 20150045 | 56 | male | 7.5 | Ⅰ | Unilateral | Positive | Moderately |
| 20130047 | 20 | female | 15.9 | Ⅲ | Unilateral | Negative | Well |
| 20150059 | 65 | male | 13.2 | Ⅰ | Unilateral | Positive | Moderately |
| 20150081 | 45 | male | 7.2 | Ⅳ | Unilateral | Positive | Poorly |
| 20150086 | 31 | female | 9.8 | Ⅱ | Bilateral | Positive | Moderately |
| 20150094 | 20 | female | 11.5 | Ⅱ | Unilateral | Negative | Well |
| 20150153 | 118 | female | 10.1 | Ⅲ | Bilateral | Negative | Poorly |
| 20150163 | 64 | male | 5.2 | Ⅲ | Unilateral | Positive | Moderately |
| 20150185 | 46 | female | 4.5 | Ⅳ | Bilateral | Positive | Well |
| 20150234 | 24 | male | 11.6 | Ⅳ | Unilateral | Negative | Moderately |
| 20150301 | 56 | male | 12.7 | Ⅰ | Unilateral | Negative | Moderately |
| 20150314 | 11 | male | 6.2 | Ⅲ | Bilateral | Negative | Poorly |
| 20160007 | 70 | male | 10.8 | IV | Bilateral | Positive | Moderately |
| 20160029 | 57 | female | 11.5 | Ⅰ | Unilateral | Positive | Well |
| 20160038 | 71 | female | 11.1 | Ⅲ | Unilateral | Negative | Moderately |
| 20160044 | 13 | male | 6.2 | Ⅳ | Bilateral | Negative | Poorly |
| 20160056 | 34 | female | 12.5 | Ⅱ | Unilateral | Positive | Moderately |
| 20160071 | 17 | male | 13.2 | Ⅰ | Bilateral | Negative | Moderately |
| 20160072 | 25 | male | 11.8 | Ⅰ | Bilateral | Positive | Poorly |
| 20160085 | 42 | female | 4.8 | Ⅲ | Unilateral | Positive | Well |
| 20160106 | 30 | male | 3.7 | Ⅱ | Bilateral | Positive | Well |
| 20160137 | 23 | female | 16.2 | Ⅳ | Bilateral | Negative | Moderately |
| 20160203 | 19 | male | 10.3 | Ⅰ | Unilateral | Negative | Moderately |
| 20170056 | 14 | female | 11.6 | Ⅰ | Unilateral | Positive | Poorly |
| 20160068 | 55 | male | 11.7 | Ⅱ | Unilateral | Negative | Poorly |
| 20160079 | 34 | male | 8.2 | Ⅲ | Bilateral | Positive | Well |
| 20161021 | 24 | female | 7.2 | Ⅱ | Bilateral | Negative | Moderately |
| 20160137 | 92 | female | 9.4 | Ⅳ | Unilateral | Positive | Well |
| 20170015 | 51 | male | 3.6 | Ⅱ | Unilateral | Positive | Poorly |
| 20170019 | 47 | female | 6.9 | Ⅳ | Unilateral | Positive | Moderately |
